# Supplementary material
Source: Springer Nature journal article supplement (https://www.springermedizin.de/resource/supplementary/12936_2008_638_MOESM3_ESM.pdf/9547882)

QD ML AR S M M/S n.c.

-/- -/- -/- -/- +/+ +/-

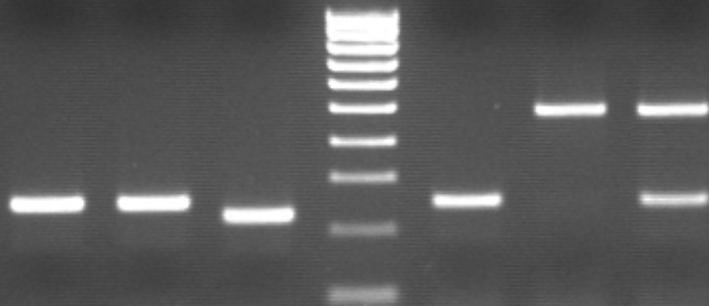

Supplement: MOESM3 [file 9547882]
